# Supplementary material for: Exploring Ag(111) Substrate for Epitaxially Growing Monolayer Stanene: A First-Principles Study
Source: PubMed Central journal article supplement (PMC4931515; doi:10.1038/srep29107), 2016-07-04
Supplement: srep29107-s1.pdf [file srep29107-s1.pdf]

## Supplementary information

### Exploring Ag(111) Substrate for Epitaxially Growing Monolayer Stanene:

#### A First-Principles Study

Junfeng Gao, Gang Zhang<sup>\*(a)</sup>, Yong-Wei Zhang<sup>\*(b)</sup>

<sup>(a)</sup> E-mail: [zhangg@ihpc.a-star.edu.sg](mailto:zhangg@ihpc.a-star.edu.sg); <sup>(b)</sup> [zhangyw@ihpc.a-star.edu.sg](mailto:zhangyw@ihpc.a-star.edu.sg)

*Institute of High Performance Computing, A\*STAR, Singapore 138632*

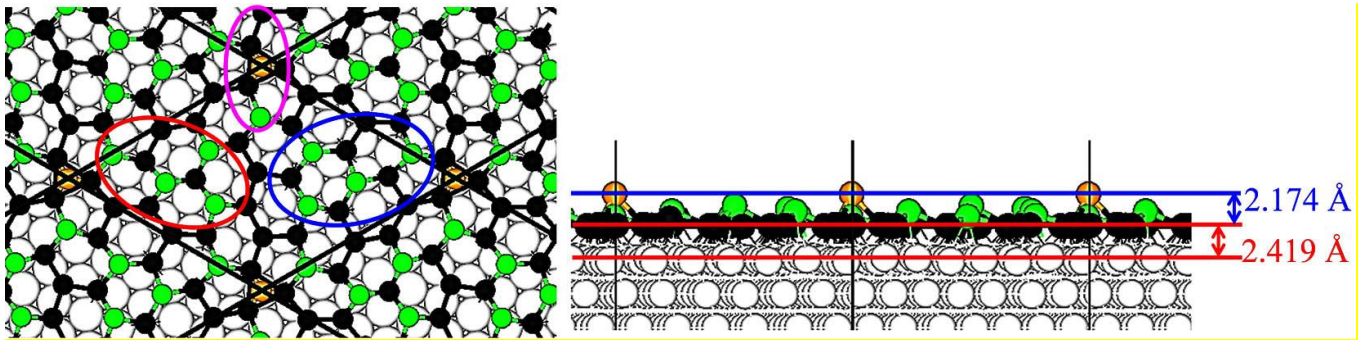

**Figure S1.** Optimized structure of the supercell containing a  $(4 \times 4)R0^\circ$  stanene on a  $(\sqrt{43} \times \sqrt{43})R7.589^\circ$  Ag(111), with dimensions of  $19.229 \text{ \AA} \times 19.229 \text{ \AA} \times 25.000 \text{ \AA}$ . The buckling pattern of this large supercell can be recognized as a mixture of S1 (blue circle), S2 (red circle) and S3 (purple circle) structures (see Fig 1 in the main text). The binding energy between this stanene structure and Ag (111) surface is  $-0.058 \text{ eV\AA}^{-2}$ , and the height of the low-level Sn atoms (black balls) to Ag(111) surface is about  $2.419 \text{ \AA}$ . Both the binding energy  $E_b$  and the average height  $\bar{d}$  are between those of S1(S2) and S3. The highest buckling point of this stanene structure is  $2.174 \text{ \AA}$ .

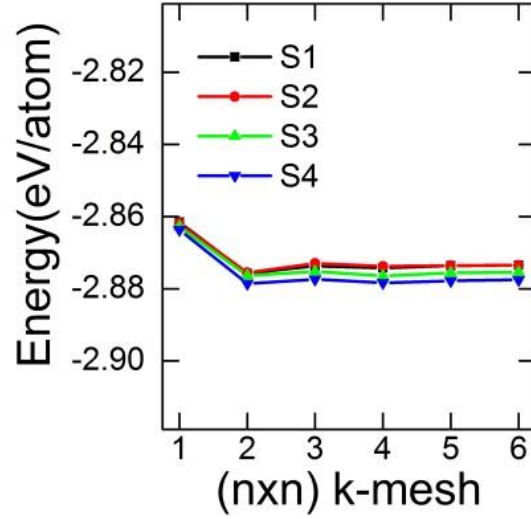

**Figure S2.** The K-mesh test for the structural relaxation of  $(\sqrt{7} \times \sqrt{7})R19.107^\circ$  stanene on  $(\sqrt{19} \times \sqrt{19})R23.413^\circ$  Ag(111) supercell. It is found the  $(2 \times 2 \times 1)$  k-mesh used in our calculations can give good energy convergence for structural relaxations; the order of stability of S1-S4 is the same as that from calculations adopted the  $(6 \times 6 \times 1)$  k-mesh.
